# Supplementary material
Source: PubMed Central journal article supplement (PMC4969075)
Supplement: NIHMS805845-supplement-Sup_Figures.pdf [file NIHMS805845-supplement-Sup_Figures.pdf]

## SUPPLEMENTAL FIGURES

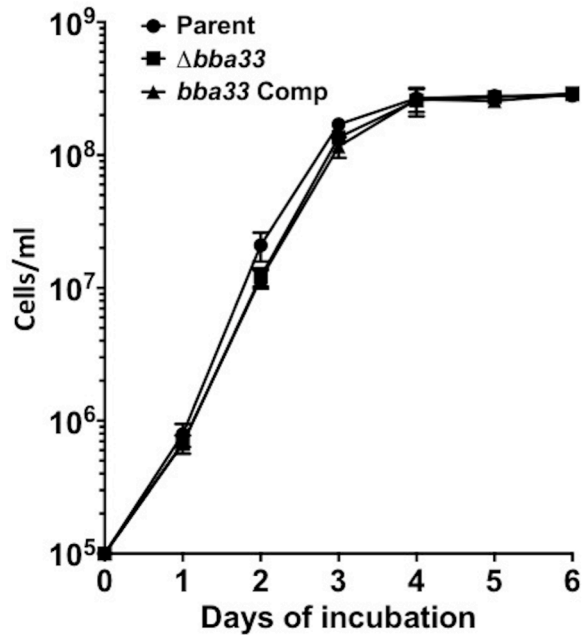

**Fig. S1.** *In vitro* growth of the *B. burgdorferi* strains used in this study. The *B. burgdorferi* Parent strain (ML23/pBBE22*luc*), the  $\Delta bba33$  mutant (HZ001/pBBE22*luc*), and the *bba33* complemented strain (HZ001/pHZ300; *bba33* Com.) were grown in triplicate in BSK-II media at 37°C, 5% CO<sub>2</sub>, pH 6.8 and enumerated by dark field microscopy daily out to day 6. Similar growth kinetics between these 3 strains were observed when the cells were grown at 32°C, 1% CO<sub>2</sub>, pH 6.8, as well as other growth conditions (not shown). Data points shown reflect average value with standard error. No significant differences in growth were observed.

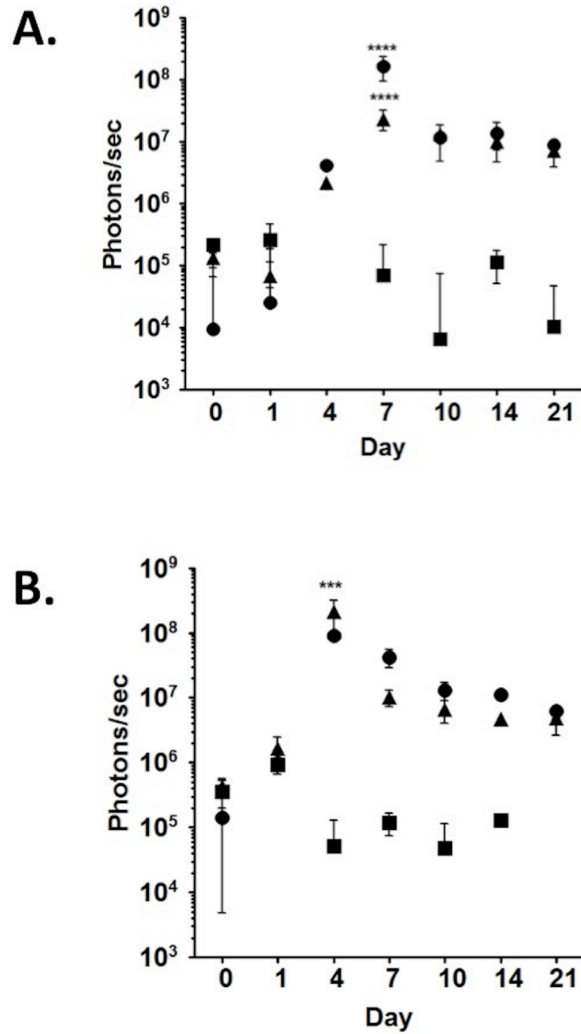

**Fig. S2.** Quantification of *in vivo* luminescence images of mice infected at a dose of  $10^3$  (A) and  $10^5$  (B) as previously described (Hyde *et al.*, 2011). *B. burgdorferi* ML23/pBBE22*luc* is depicted as circles, the  $\Delta bba33$  derivative HZO01/pBBE22*luc* as squares, and the genetic complement HZO01/pHZ300 as triangles. Each time point represents the average value from the three mice given luciferin. \*\*\* $P < 0.001$ ; \*\*\*\*  $P < 0.0001$ .
